# Supplementary material for: Genome analysis identifies differences in the transcriptional targets of duodenal versus pancreatic neuroendocrine tumours
Source: PubMed Central journal article supplement — BMJ Open Gastroenterol. 2021 Nov 8;8(1):e000765. doi: 10.1136/bmjgast-2021-000765 (PMC8576490; doi:10.1136/bmjgast-2021-000765), 2021-11-08

## Suppl Table 1: PCR Primers

| Gene   | Forward                  | Reverse               |
|--------|--------------------------|-----------------------|
| CHGA   | GATCCTTTCCATTCTGAGACATCA | GAACCTCTGAGTTCATCTTCA |
| SYP    | ACAAGACCGAGAGTGACCT      | AGTCCCCAACTAAGAAGACCT |
| NKX6.3 | GGAAGAAGCAGACACTCCTG     | TTCCGCCACTTGGTCCT     |
| NGN3   | CTCATCGCTCTCTATTCTTTTGC  | GGCAGGTCACTTCGTCTTC   |
| NEUROD | GACTATCACTGCTCAGGACCTA   | CACTCGTCTGTCCAGCTTG   |
| HPRT1  | TTGTTGTAGGATATGCCCTTGA   | GCGATGTCAATAGGACTCCAG |

## Suppl Table 2: Primary &amp; Secondary Antibodies

| Antibodies                             | Vendor                      | Catalog #  | Dilution/Application       |
|----------------------------------------|-----------------------------|------------|----------------------------|
| Gastrin                                | Dako Agilent                | A0568      | 1:1000 (IF)                |
| NFκB-p65                               | Cell Signaling Technologies | 8242S      | 1:100 (IHC/IF) 1:1000 (WB) |
| Nkx6.3                                 | Novus Biologicals           | NBP1-92185 | 1:50 (IHC) 1:1000 (WB)     |
| Synaptophysin                          | Cell Signaling Technologies | 9020S      | 1:200 (IF)                 |
| α-SMA                                  | Thermo Scientific           | MS-113-P0  | 1:200 (IF)                 |
| S100b                                  | Abcam                       | Ab52642    | 1:100 (IF)                 |
| IL-17b                                 | R&D Systems                 | AF1248     | 1:100 (IF)                 |
| TNF-α                                  | R&D Systems                 | AF-410-NA  | 1:50 (IF)                  |
| TNFAIP2                                | Novus Biologicals           | NBP1-33480 | 1:100 (IF)                 |
| β-catenin                              | R&D Systems                 | AF1329     | 1:100 (IF)                 |
| pSTAT3 (Y705)                          | Cell Signaling Technologies | 9145S      | 1:100 (IF)                 |
| STAT3                                  | Cell Signaling Technologies | 9139       | 1:1000 (WB)                |
| Histone H3                             | Cell Signaling Technologies | 12648S     | 1:10000 (WB)               |
| β-Tubulin                              | Cell Signaling Technologies | 5346S      | 1:2000 (WB)                |
| GAPDH                                  | Cell Signaling Technologies | 2118S      | 1:2000 (WB)                |
| Alexa Fluor Donkey anti-Rabbit IgG 488 | Invitrogen                  | A21206     | 1:500 (IF)                 |
| Alexa Fluor Donkey anti-Mouse IgG 647  | Invitrogen                  | A31571     | 1:500 (IF)                 |
| Alexa Fluor Donkey anti-Goat IgG 594   | Invitrogen                  | A11058     | 1:500 (IF)                 |

# Supplementary Figure S1

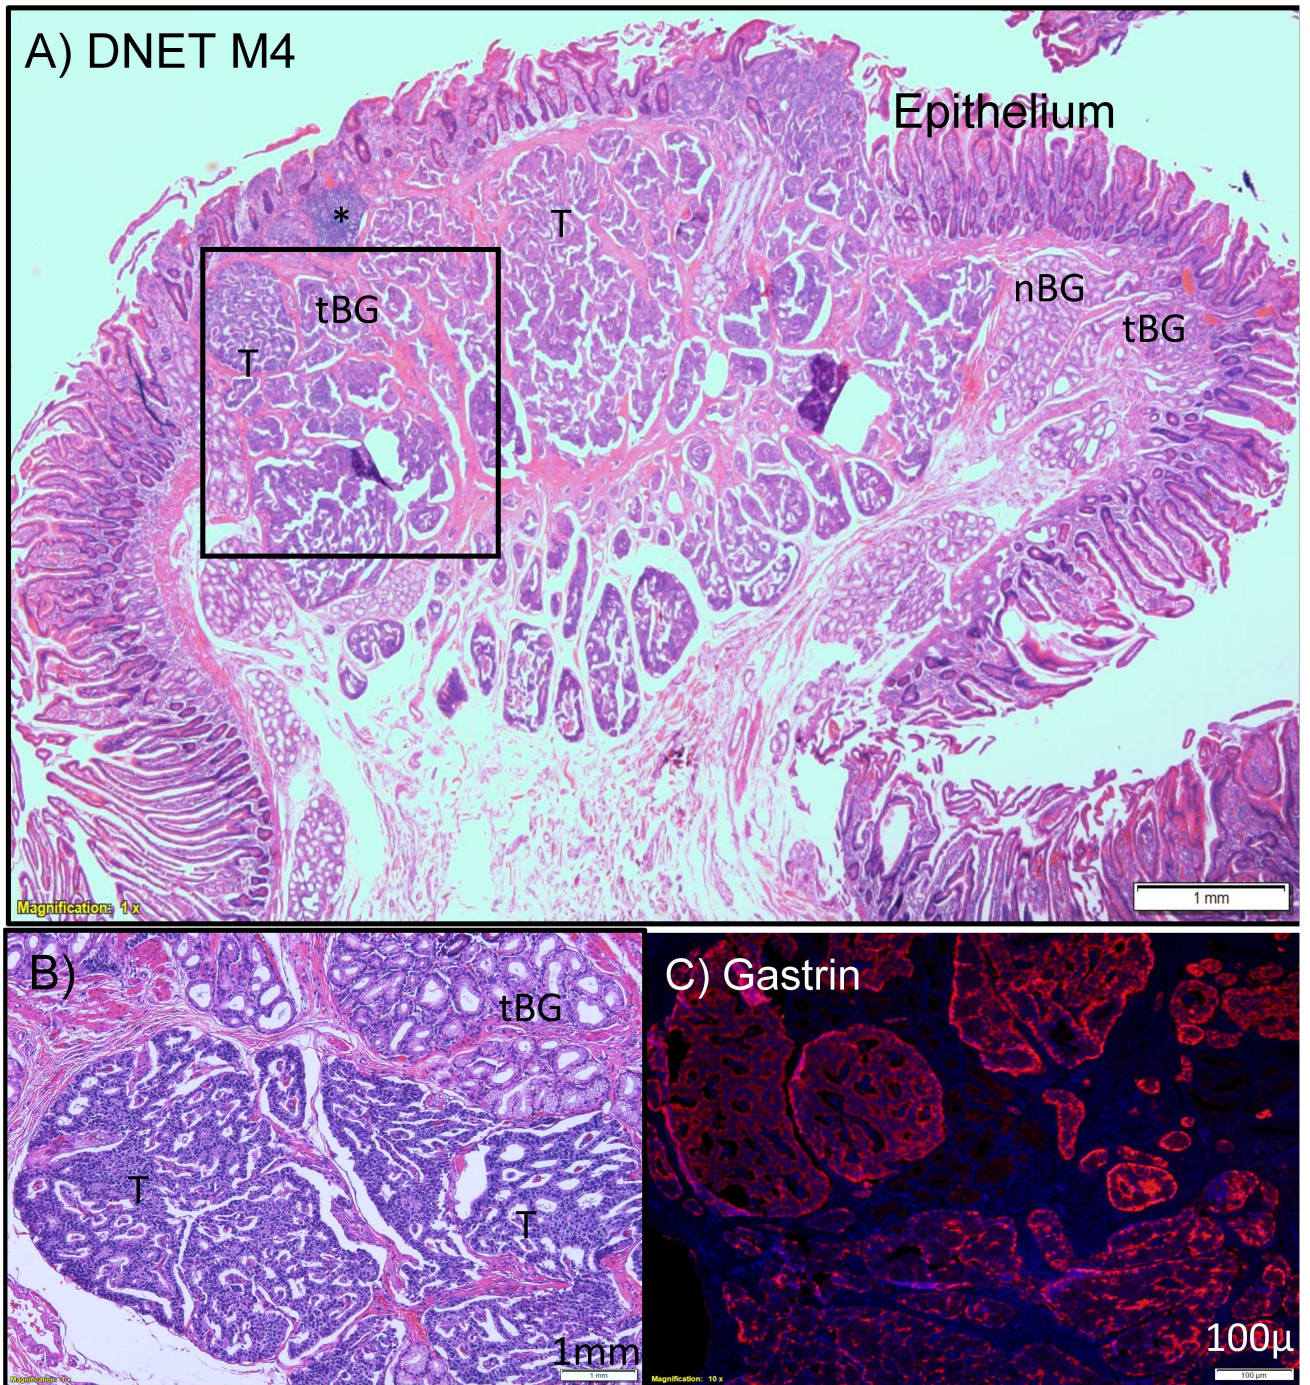

## Supplementary Figure S2

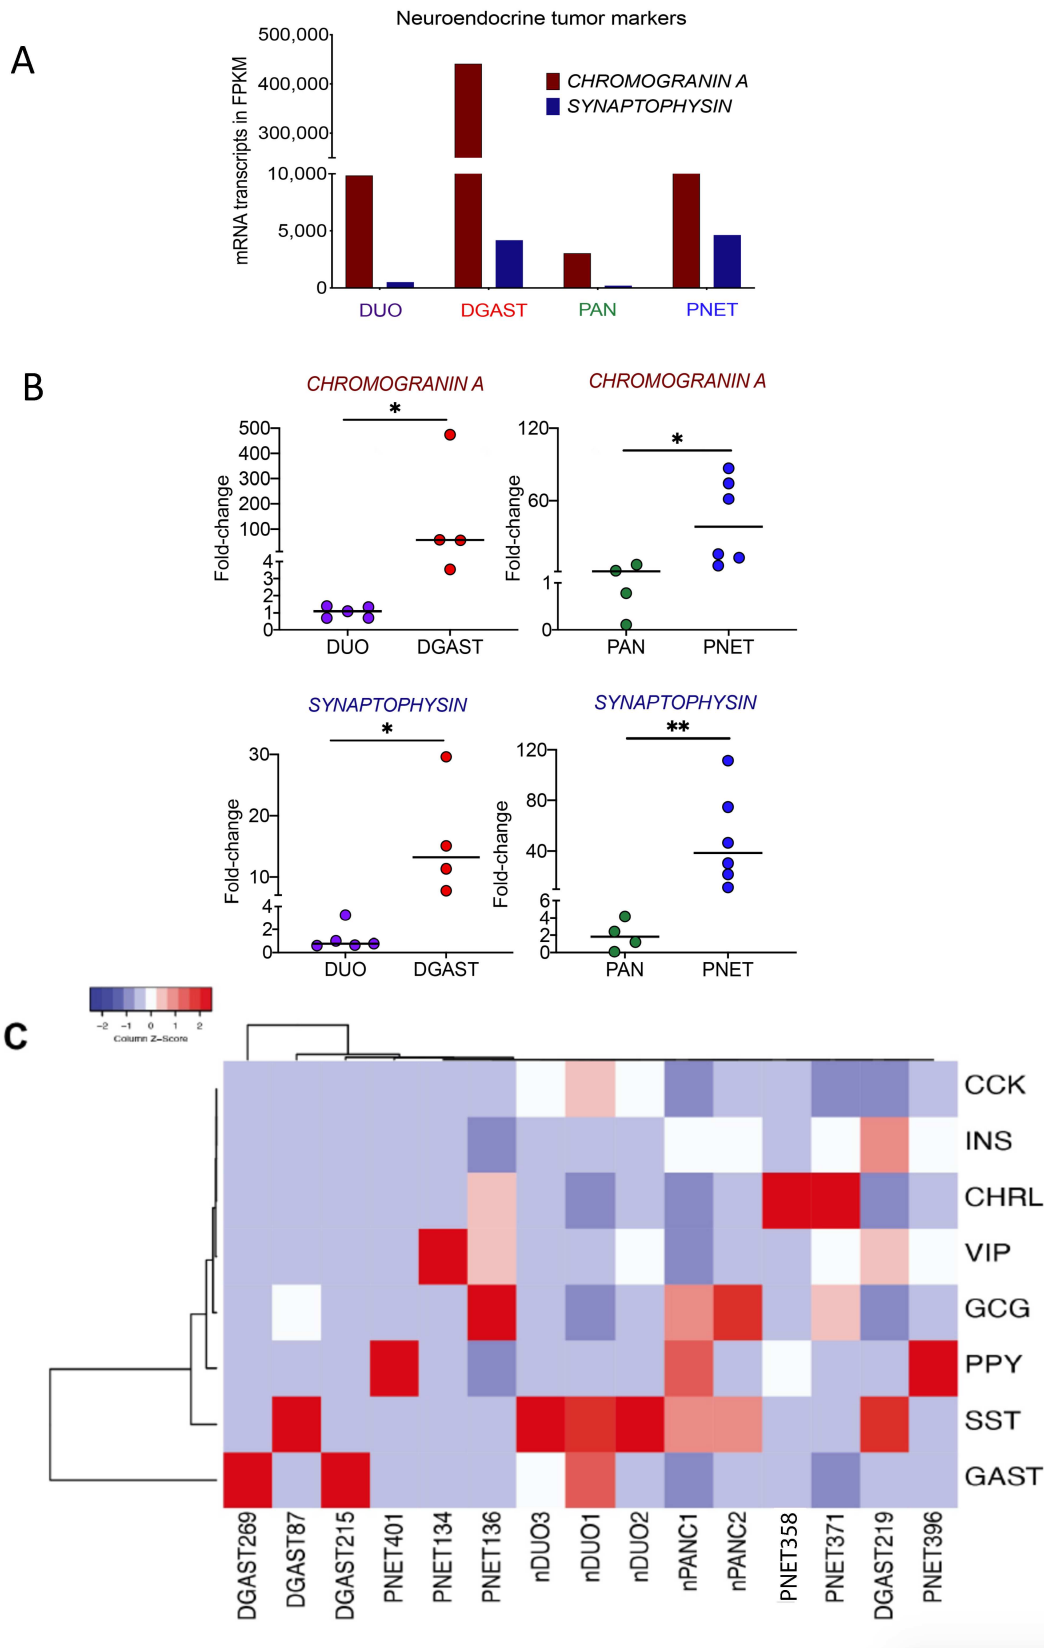



### Supplementary Figure S3

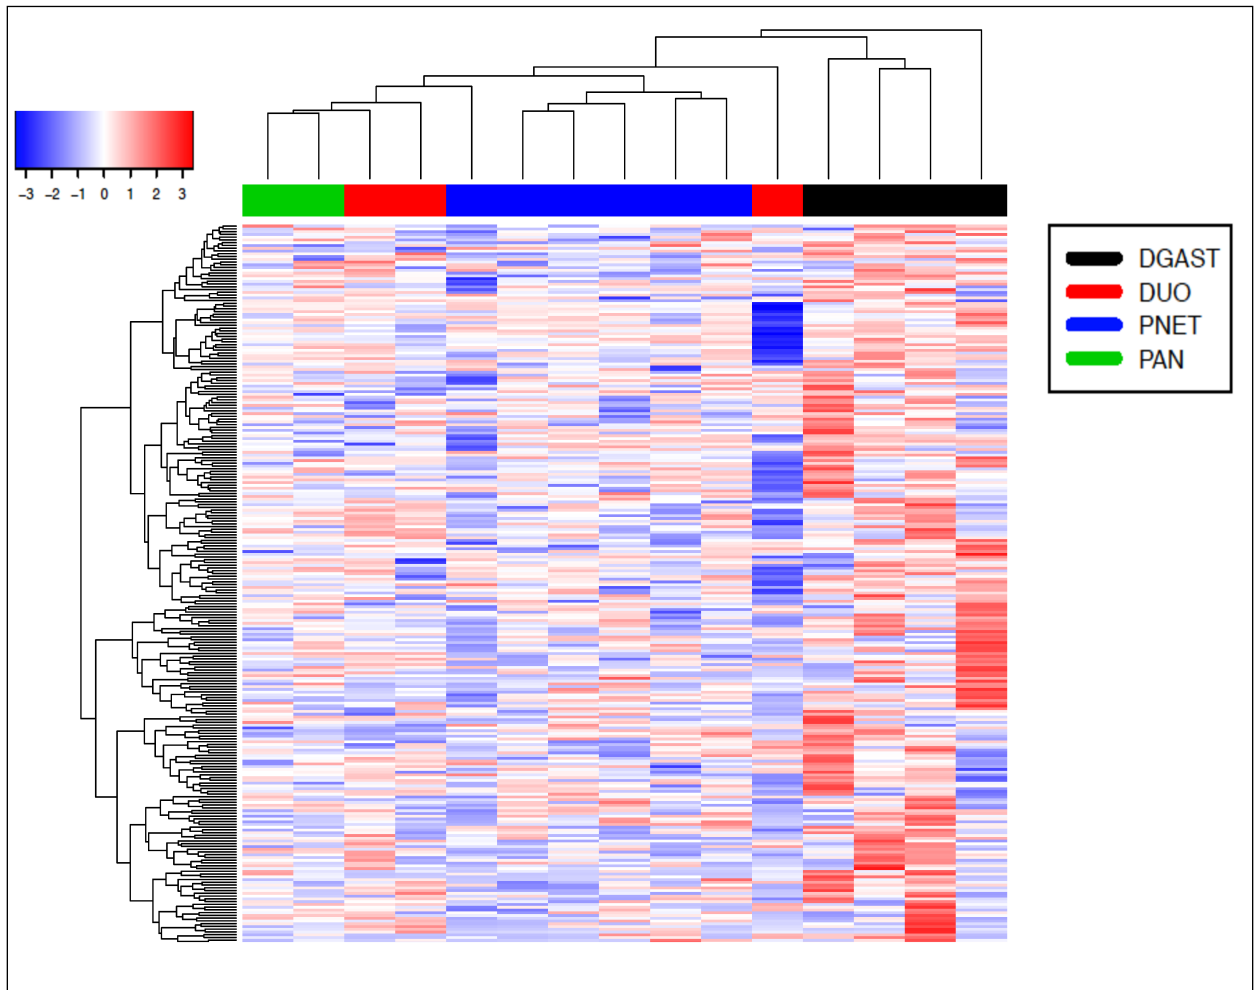



Supplementary Figure S4

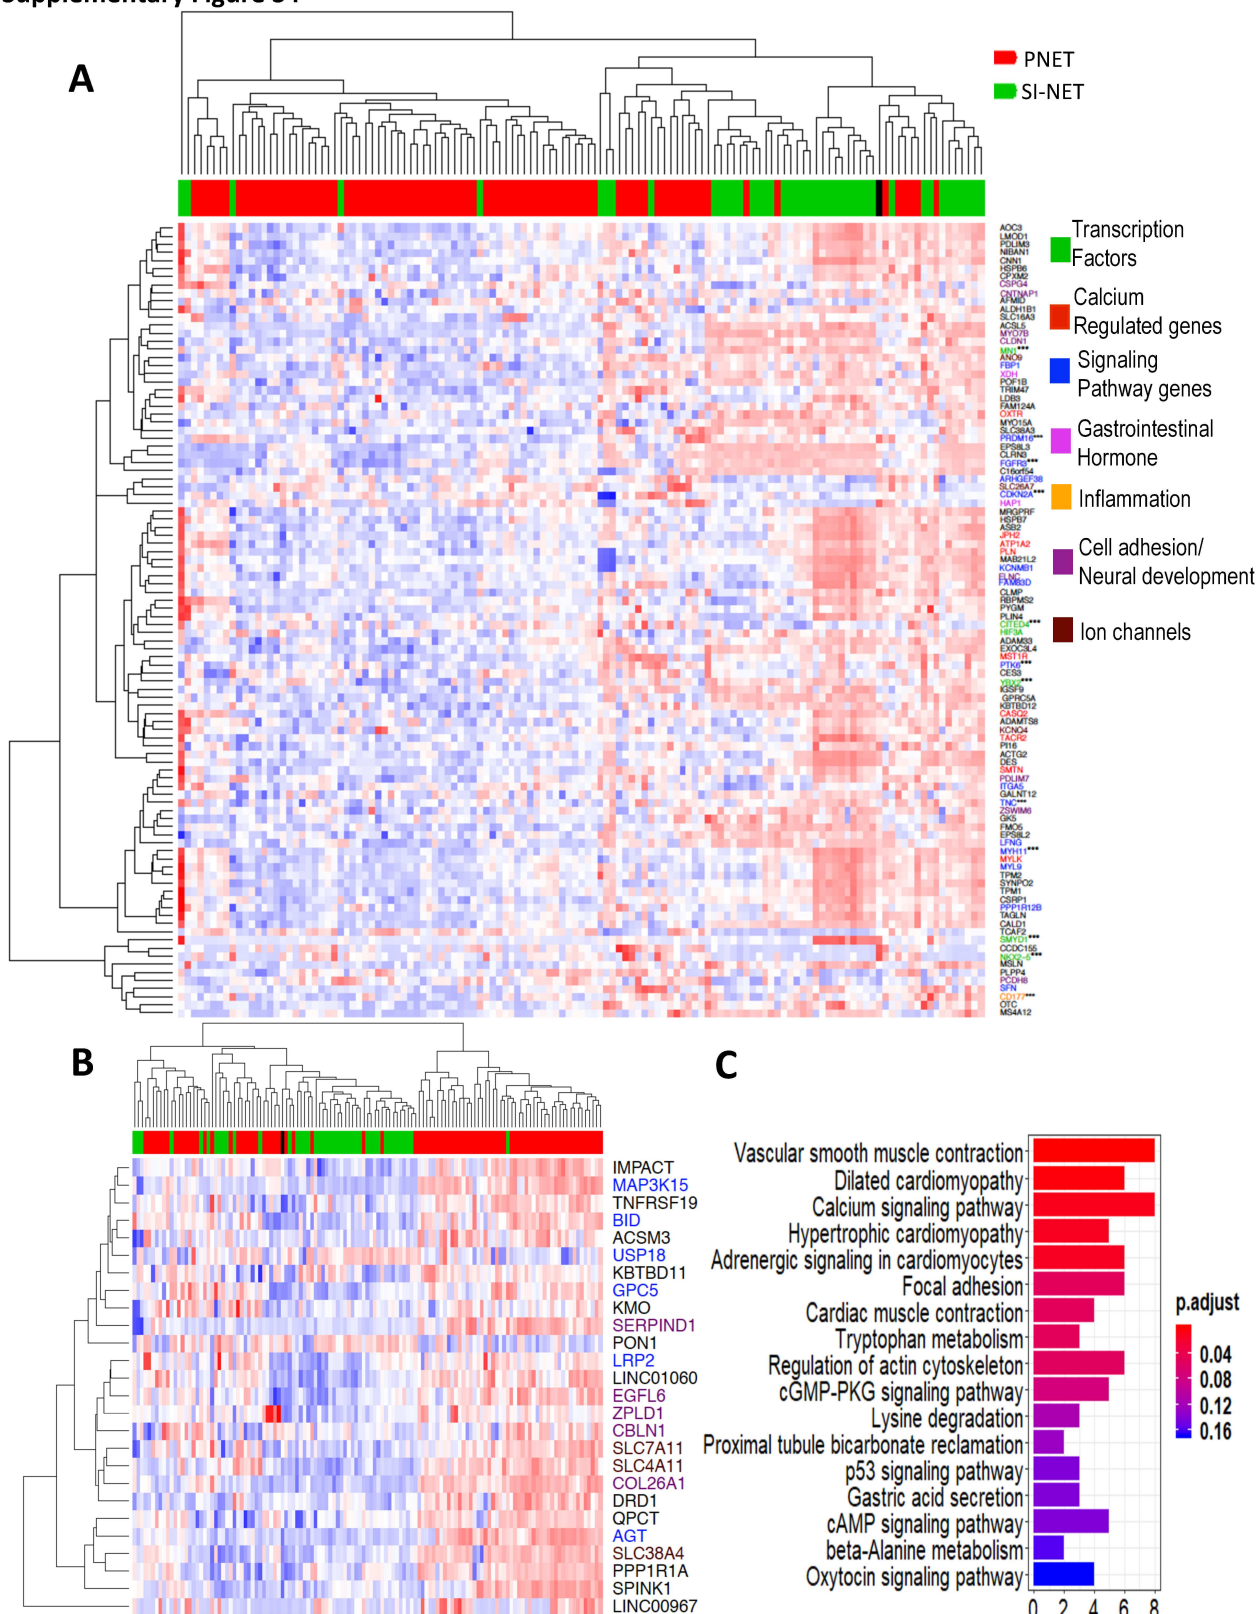

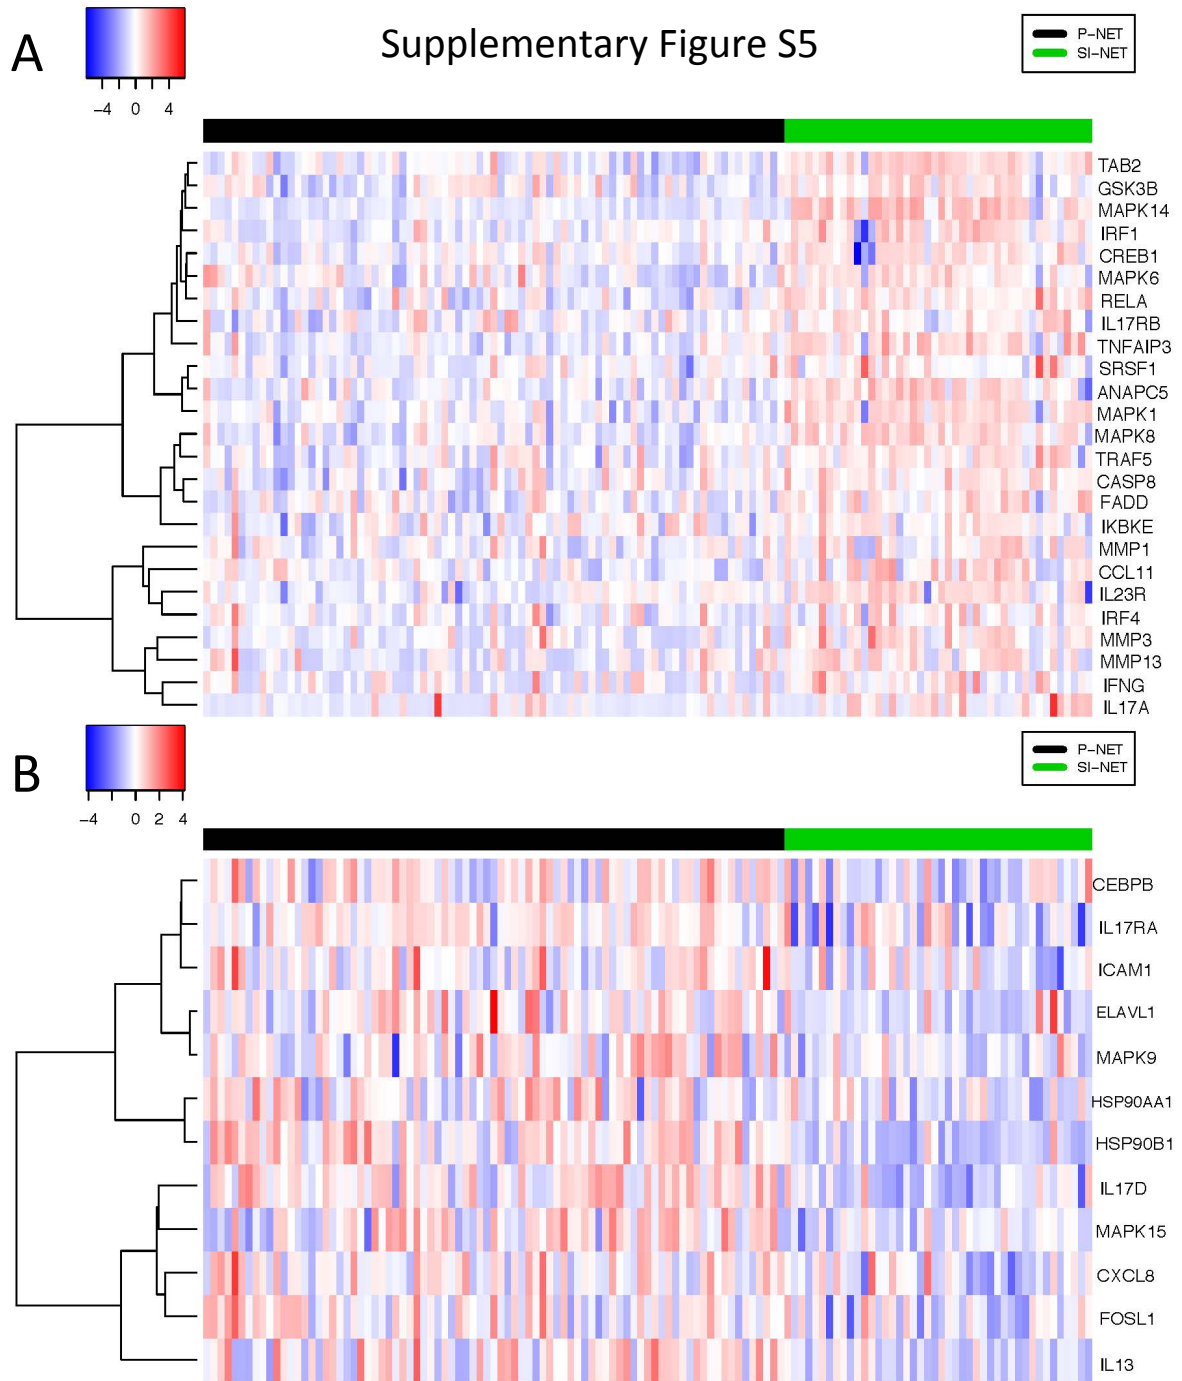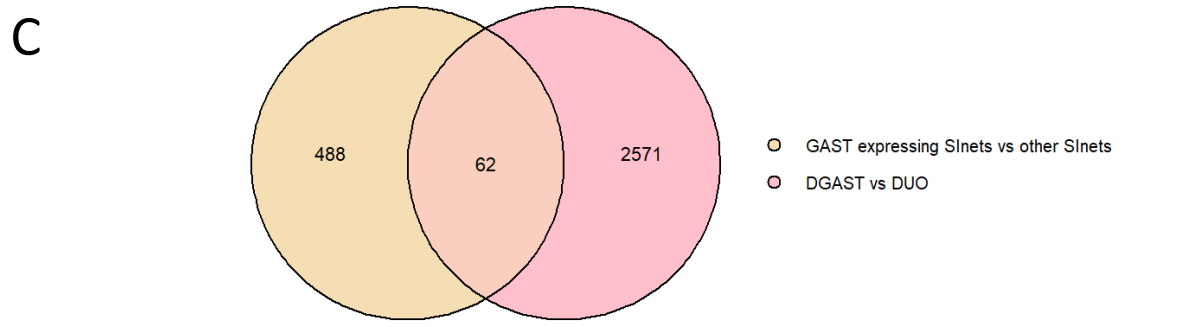



Supplementary Figure S6

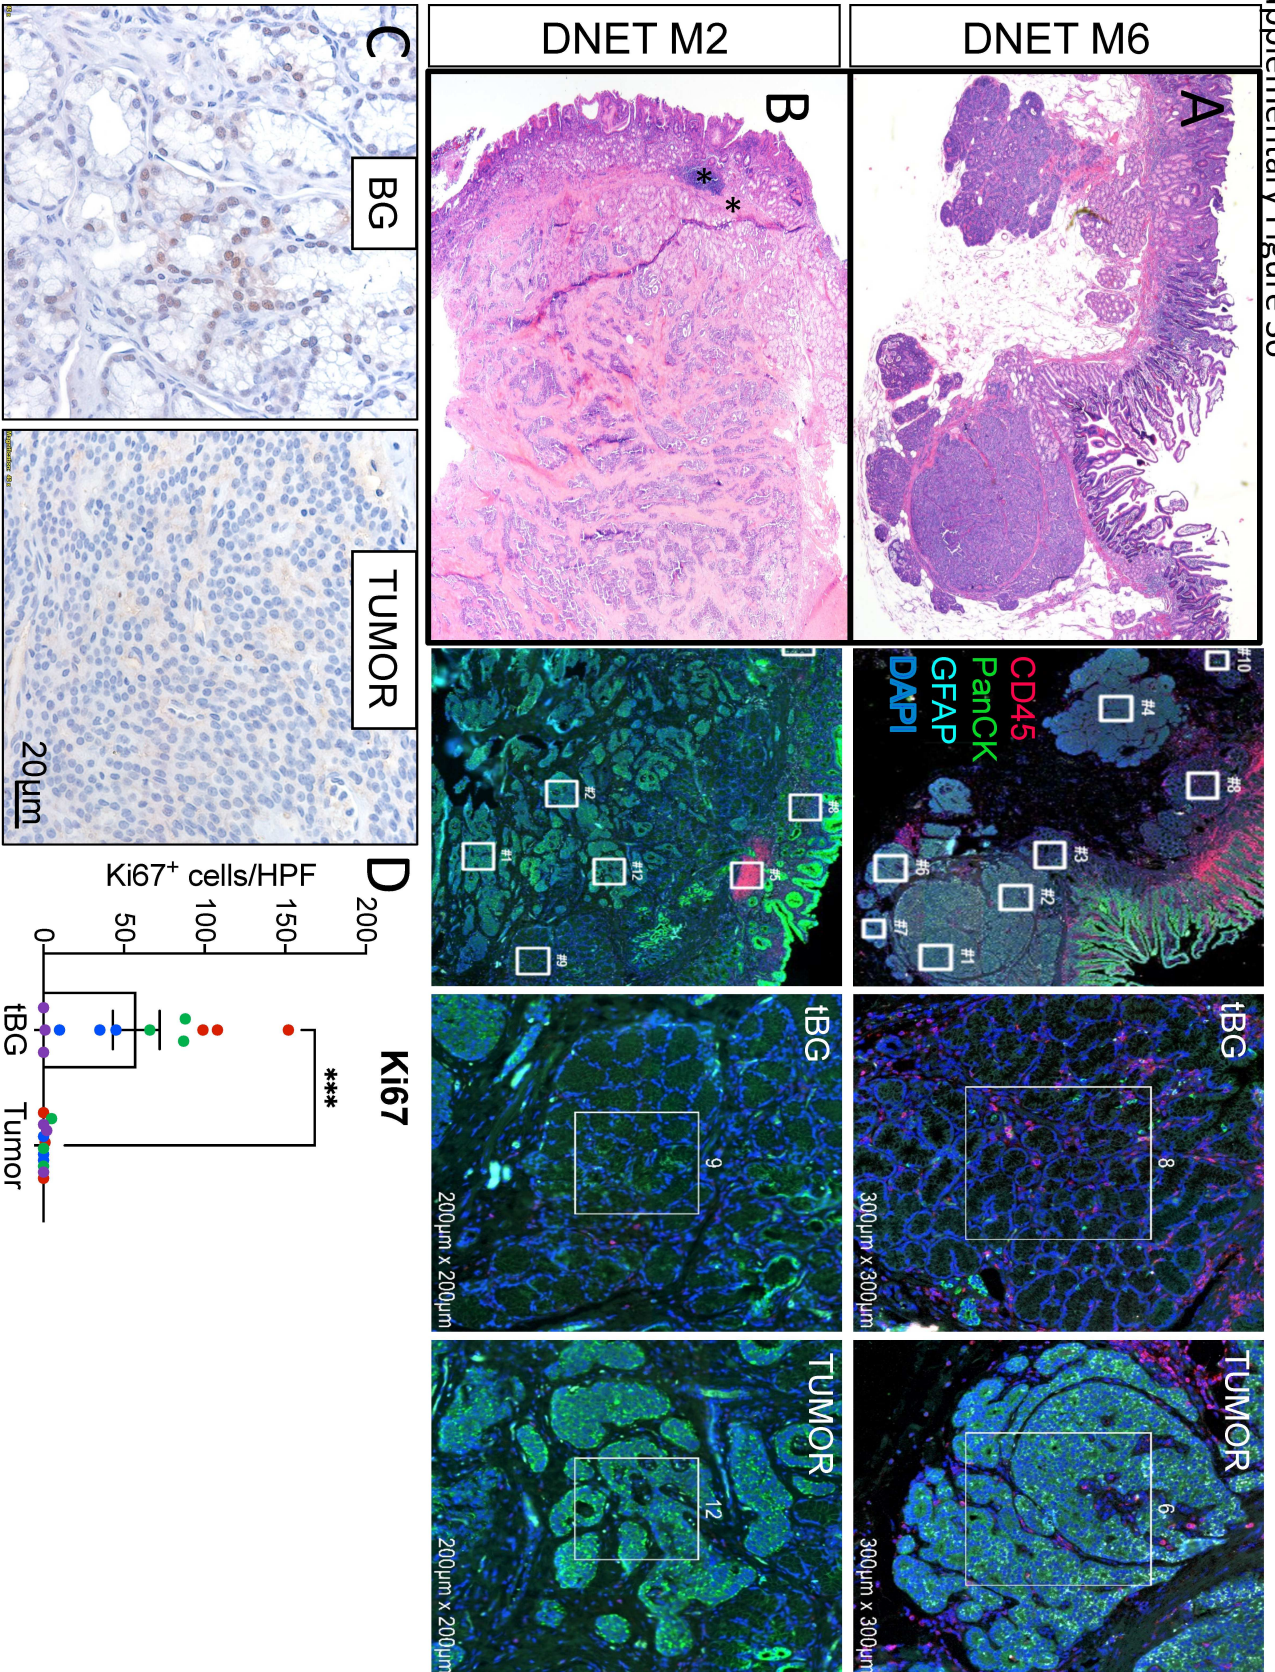



Supplementary Figure S7

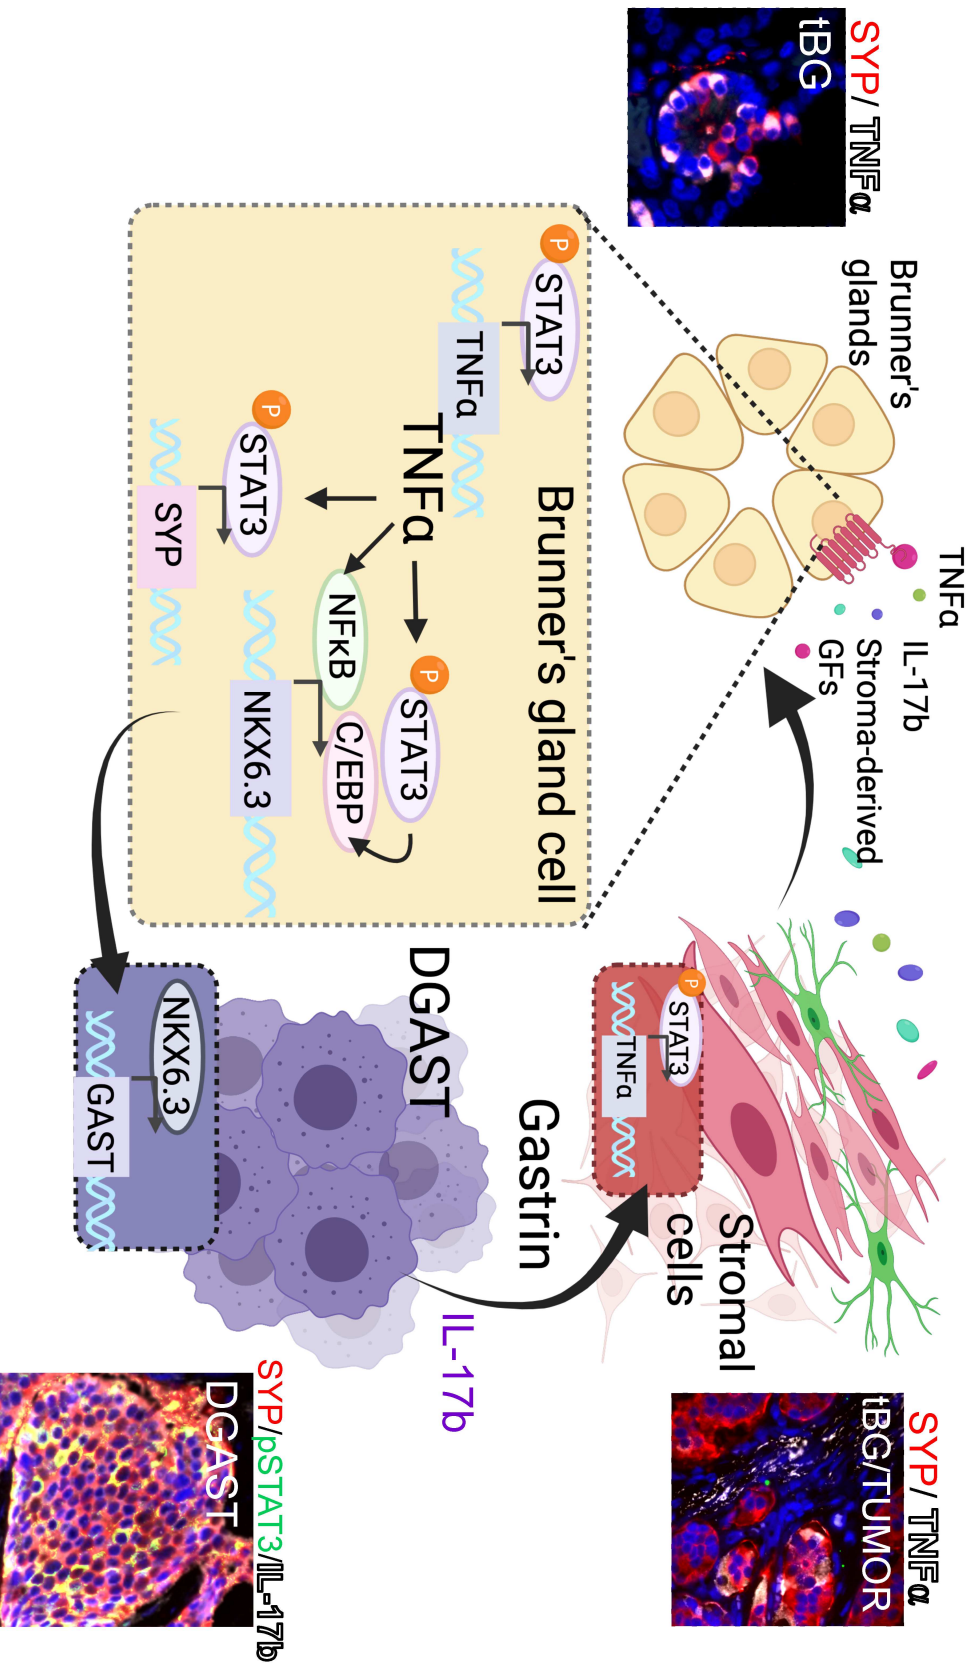

Supplement: bmjgast-2021-000765supp008.pdf [file bmjgast-2021-000765supp008.pdf]
