# Supplementary figures and images for: Genome analysis identifies differences in the transcriptional targets of duodenal versus pancreatic neuroendocrine tumours
Source: PubMed Central journal article supplement — BMJ Open Gastroenterol. 2021 Nov 8;8(1):e000765. doi: 10.1136/bmjgast-2021-000765 (PMC8576490; doi:10.1136/bmjgast-2021-000765), 2021-11-08

### Supplementary Figure S1

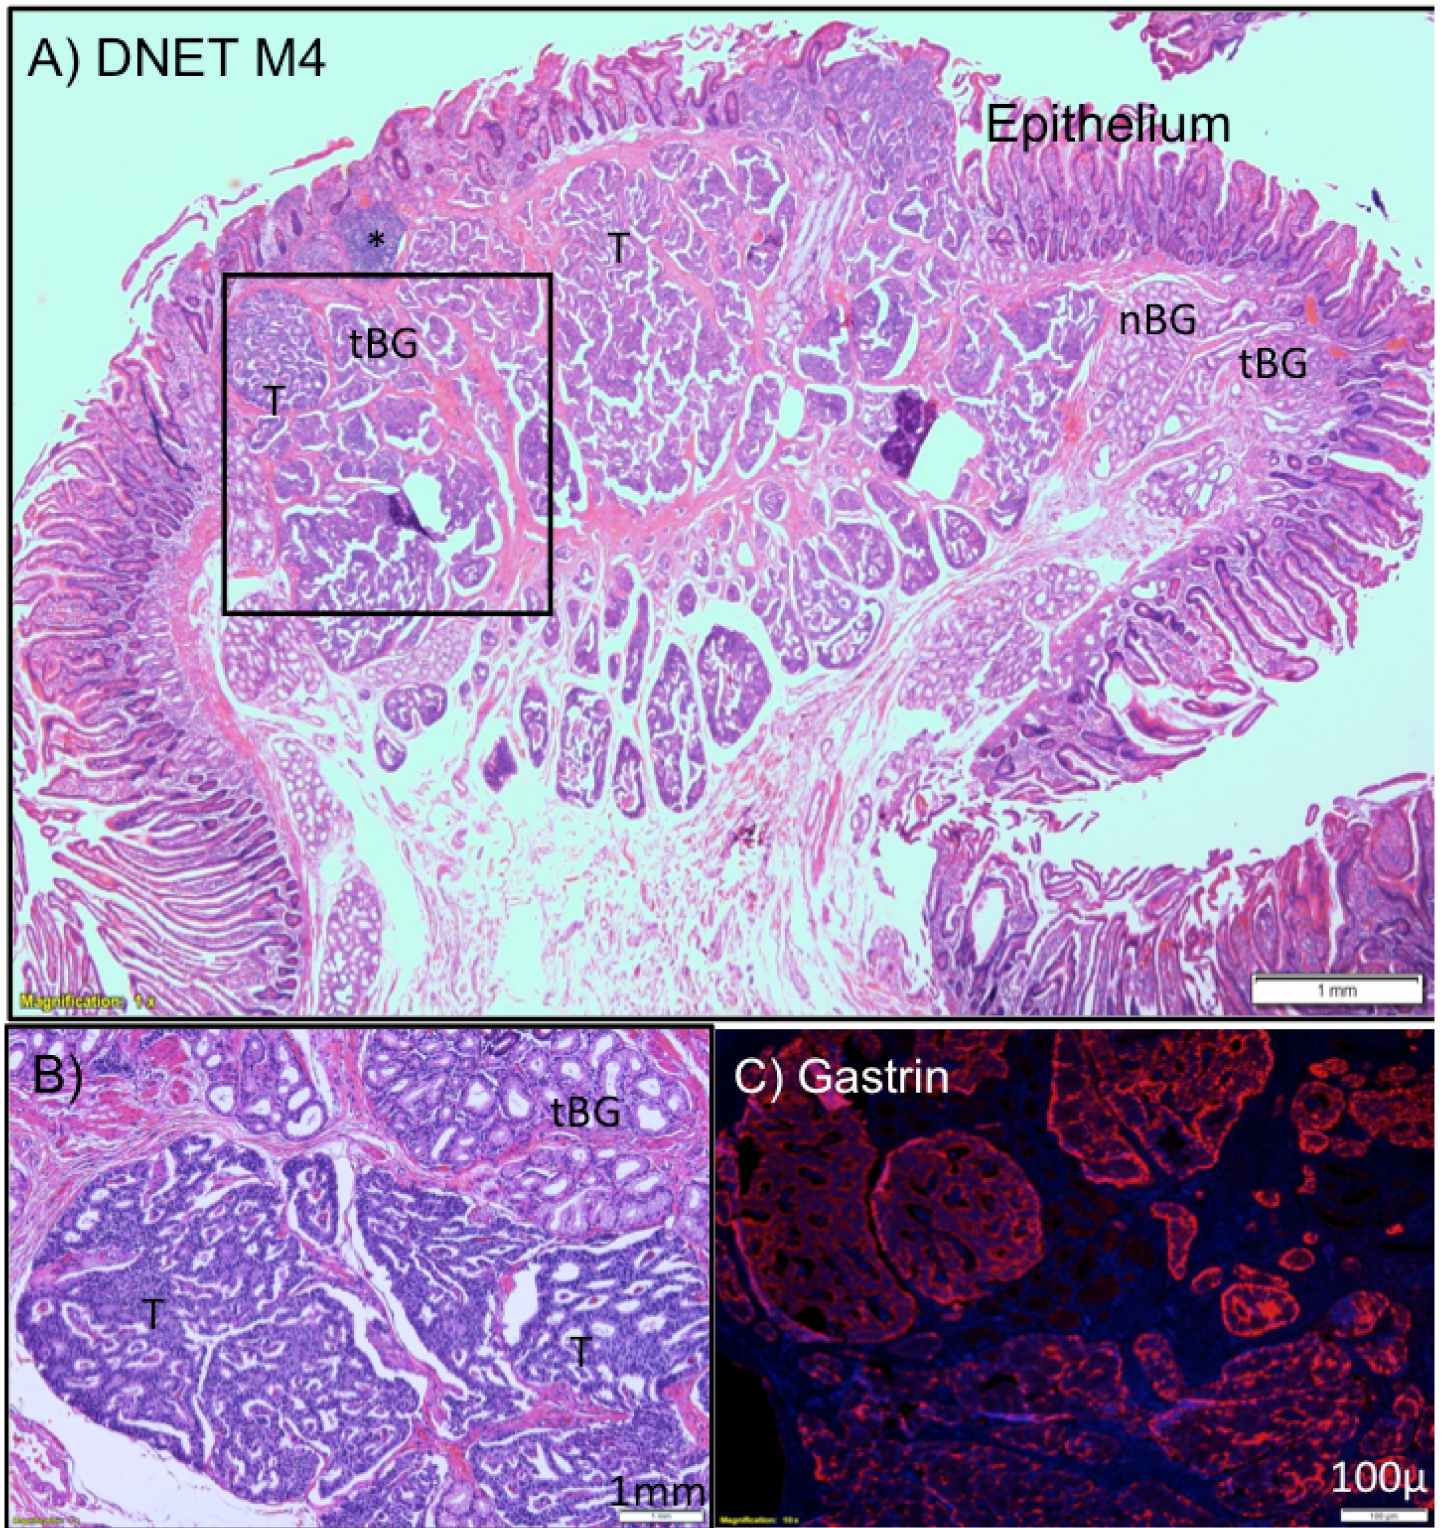

Supplement: bmjgast-2021-000765supp001.pdf [file bmjgast-2021-000765supp001.pdf]

# Supplementary Figure S2

A

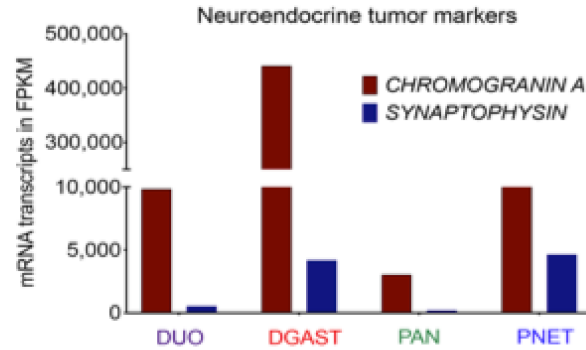

B

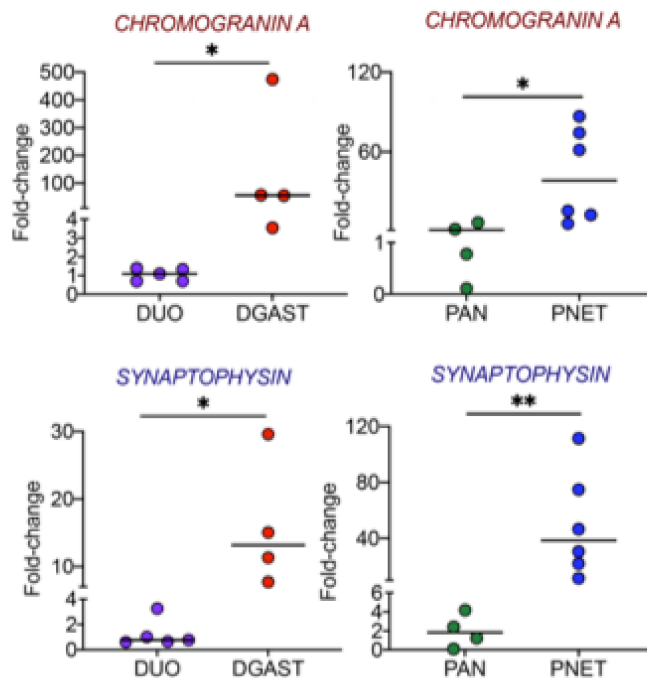

C

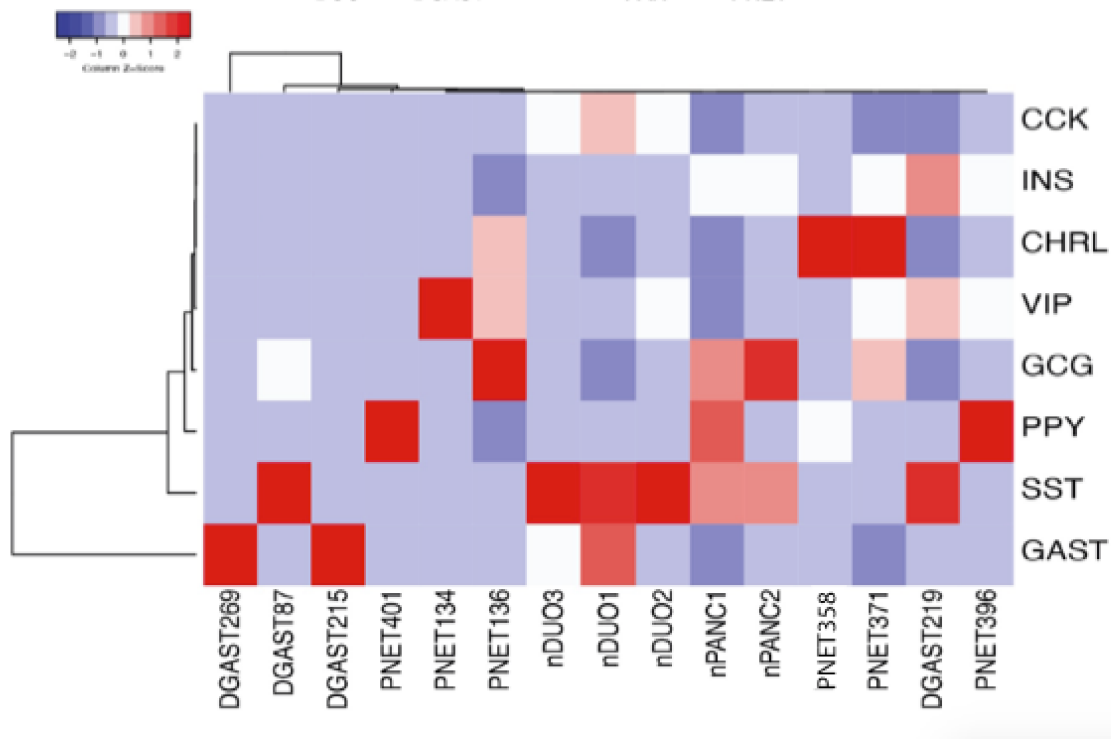

Supplement: bmjgast-2021-000765supp002.pdf [file bmjgast-2021-000765supp002.pdf]

### Supplementary Figure S3

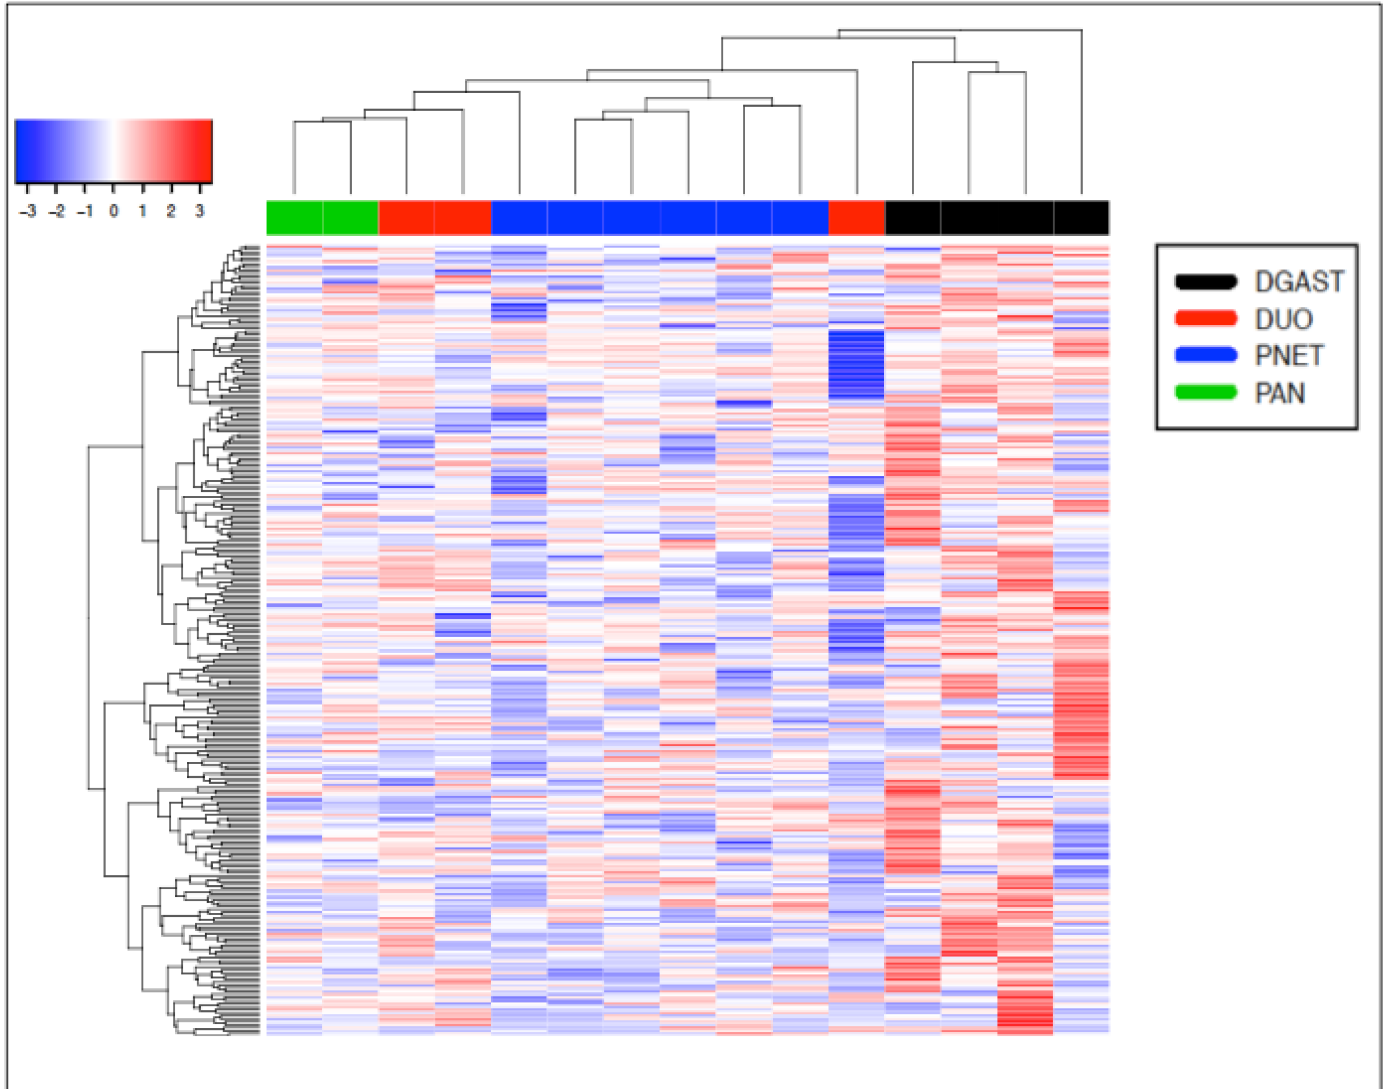

Supplement: bmjgast-2021-000765supp003.pdf [file bmjgast-2021-000765supp003.pdf]

Supplementary Figure S4

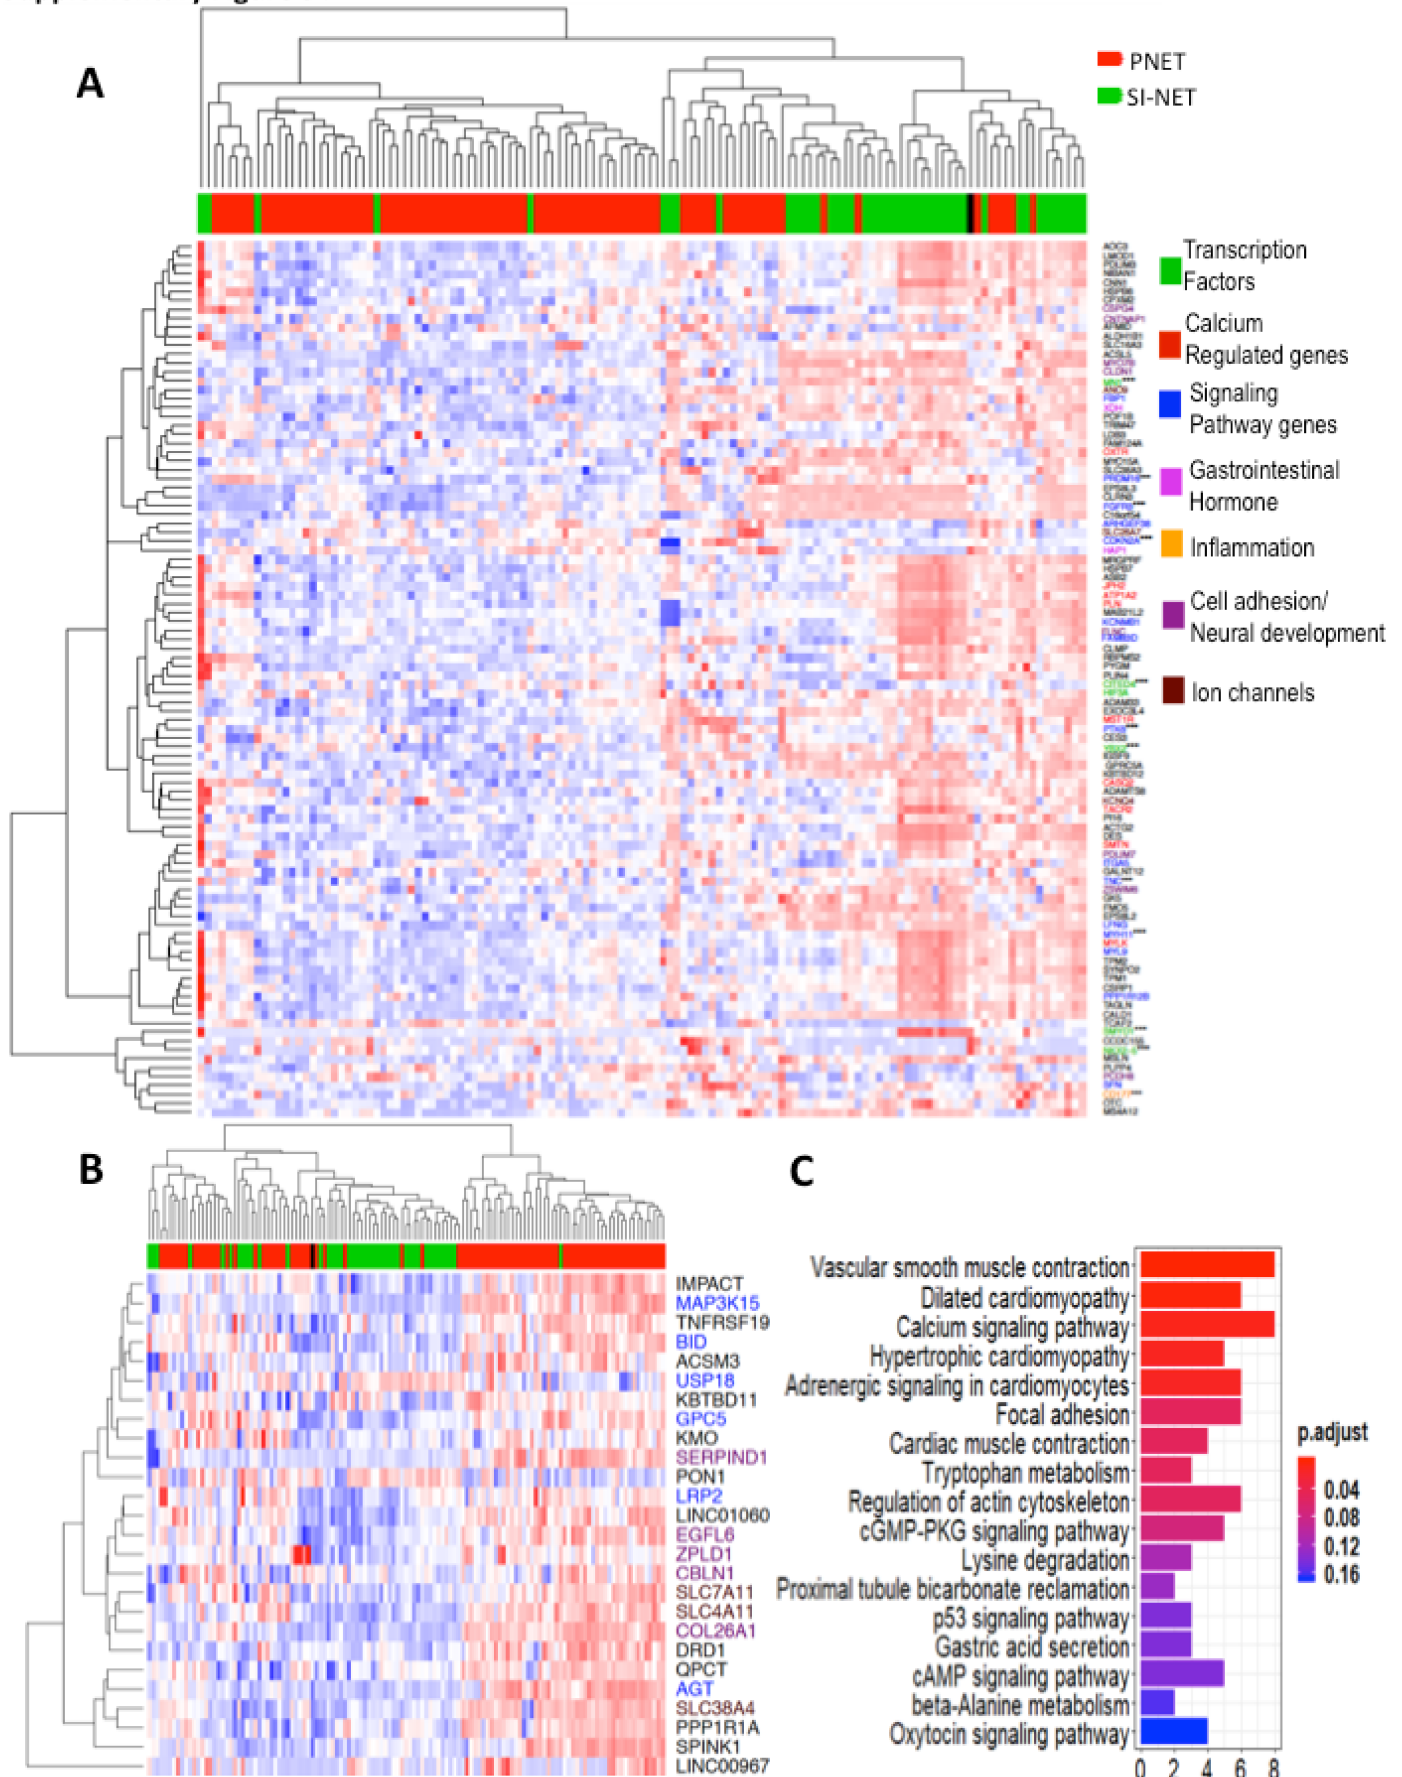

Supplement: bmjgast-2021-000765supp004.pdf [file bmjgast-2021-000765supp004.pdf]

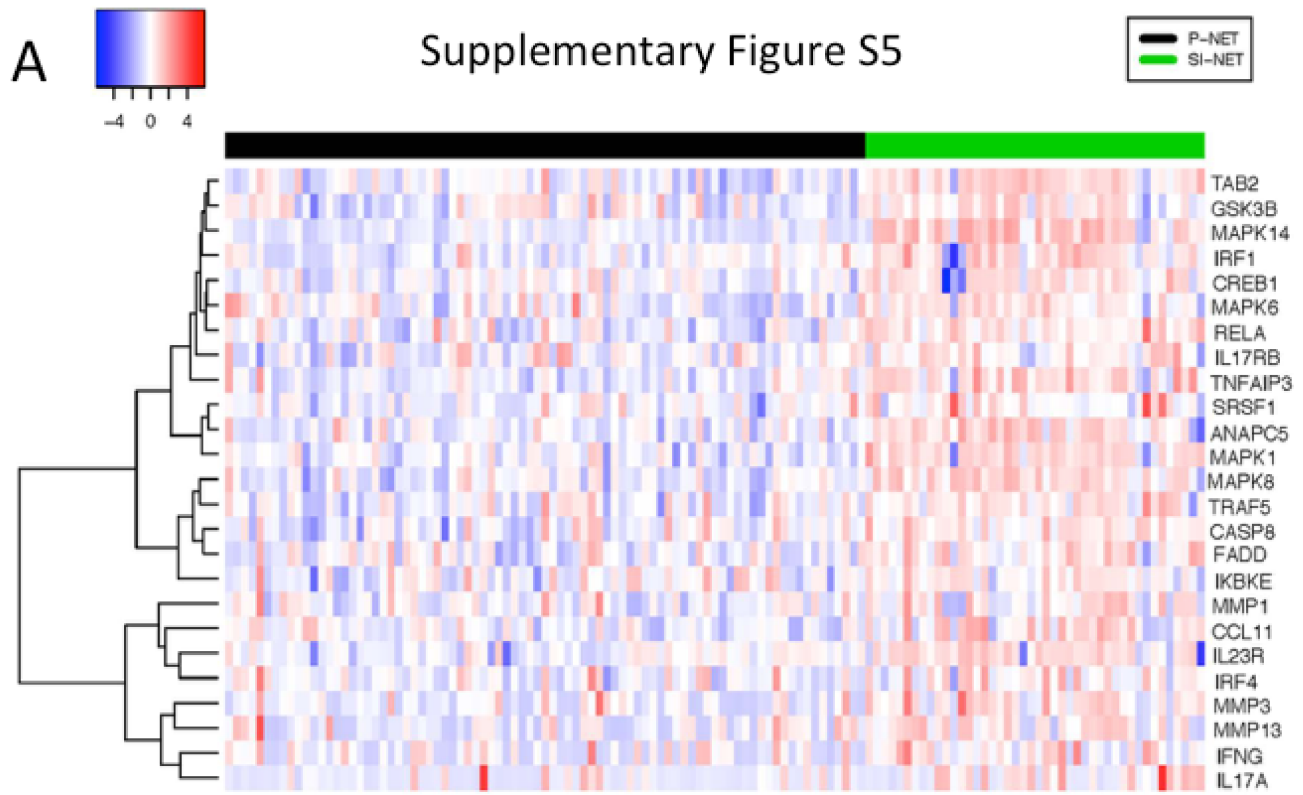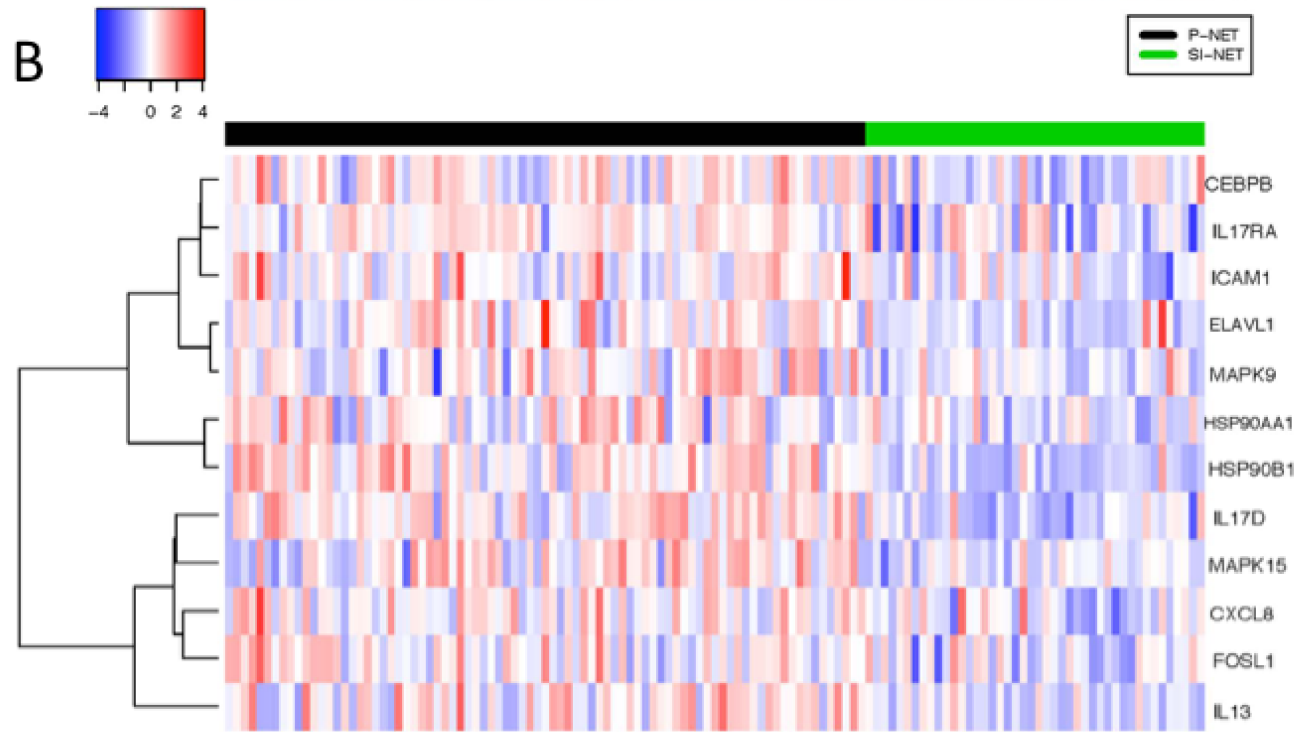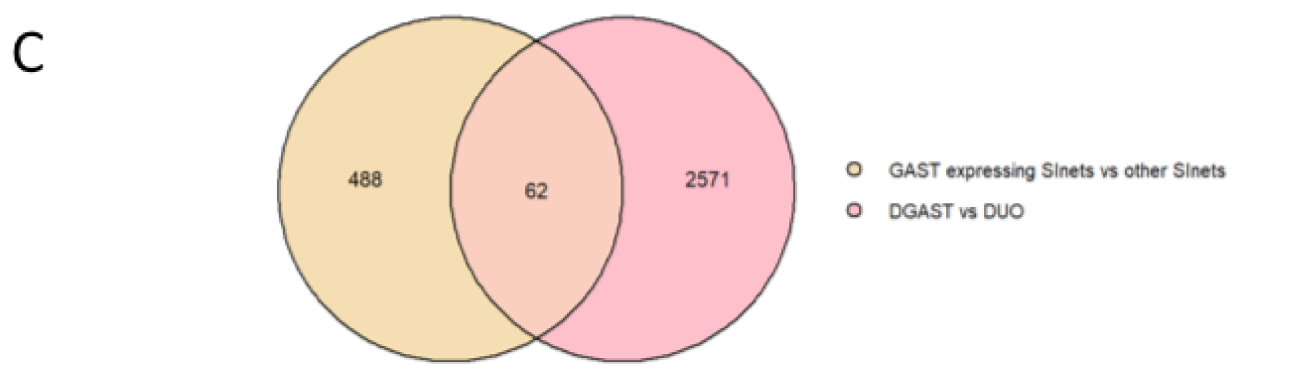

Supplement: bmjgast-2021-000765supp005.pdf [file bmjgast-2021-000765supp005.pdf]

Supplementary Figure S6

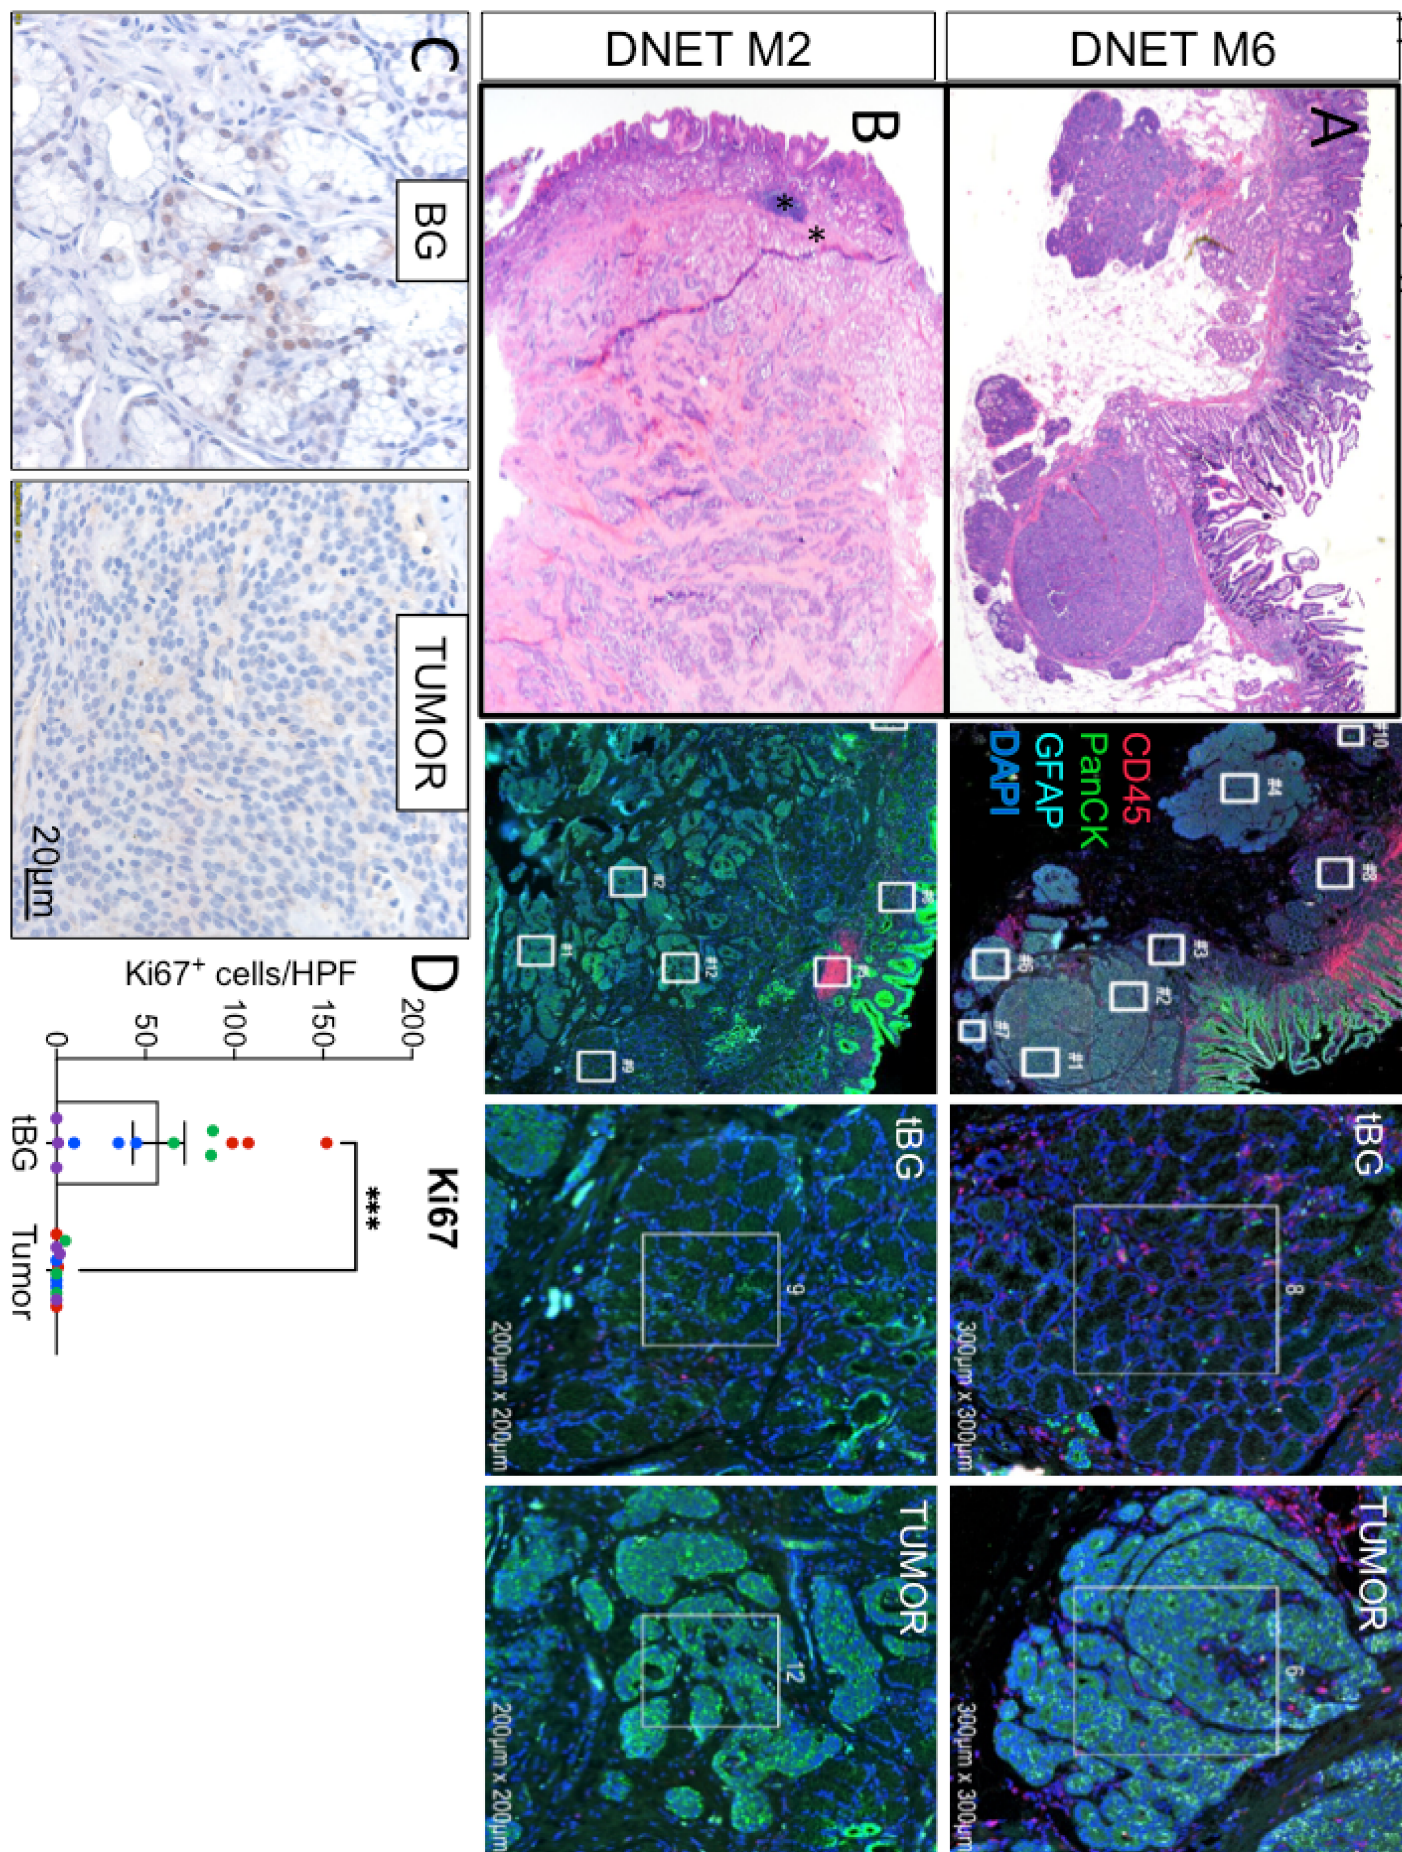

Supplement: bmjgast-2021-000765supp006.pdf [file bmjgast-2021-000765supp006.pdf]

Supplementary Figure S7

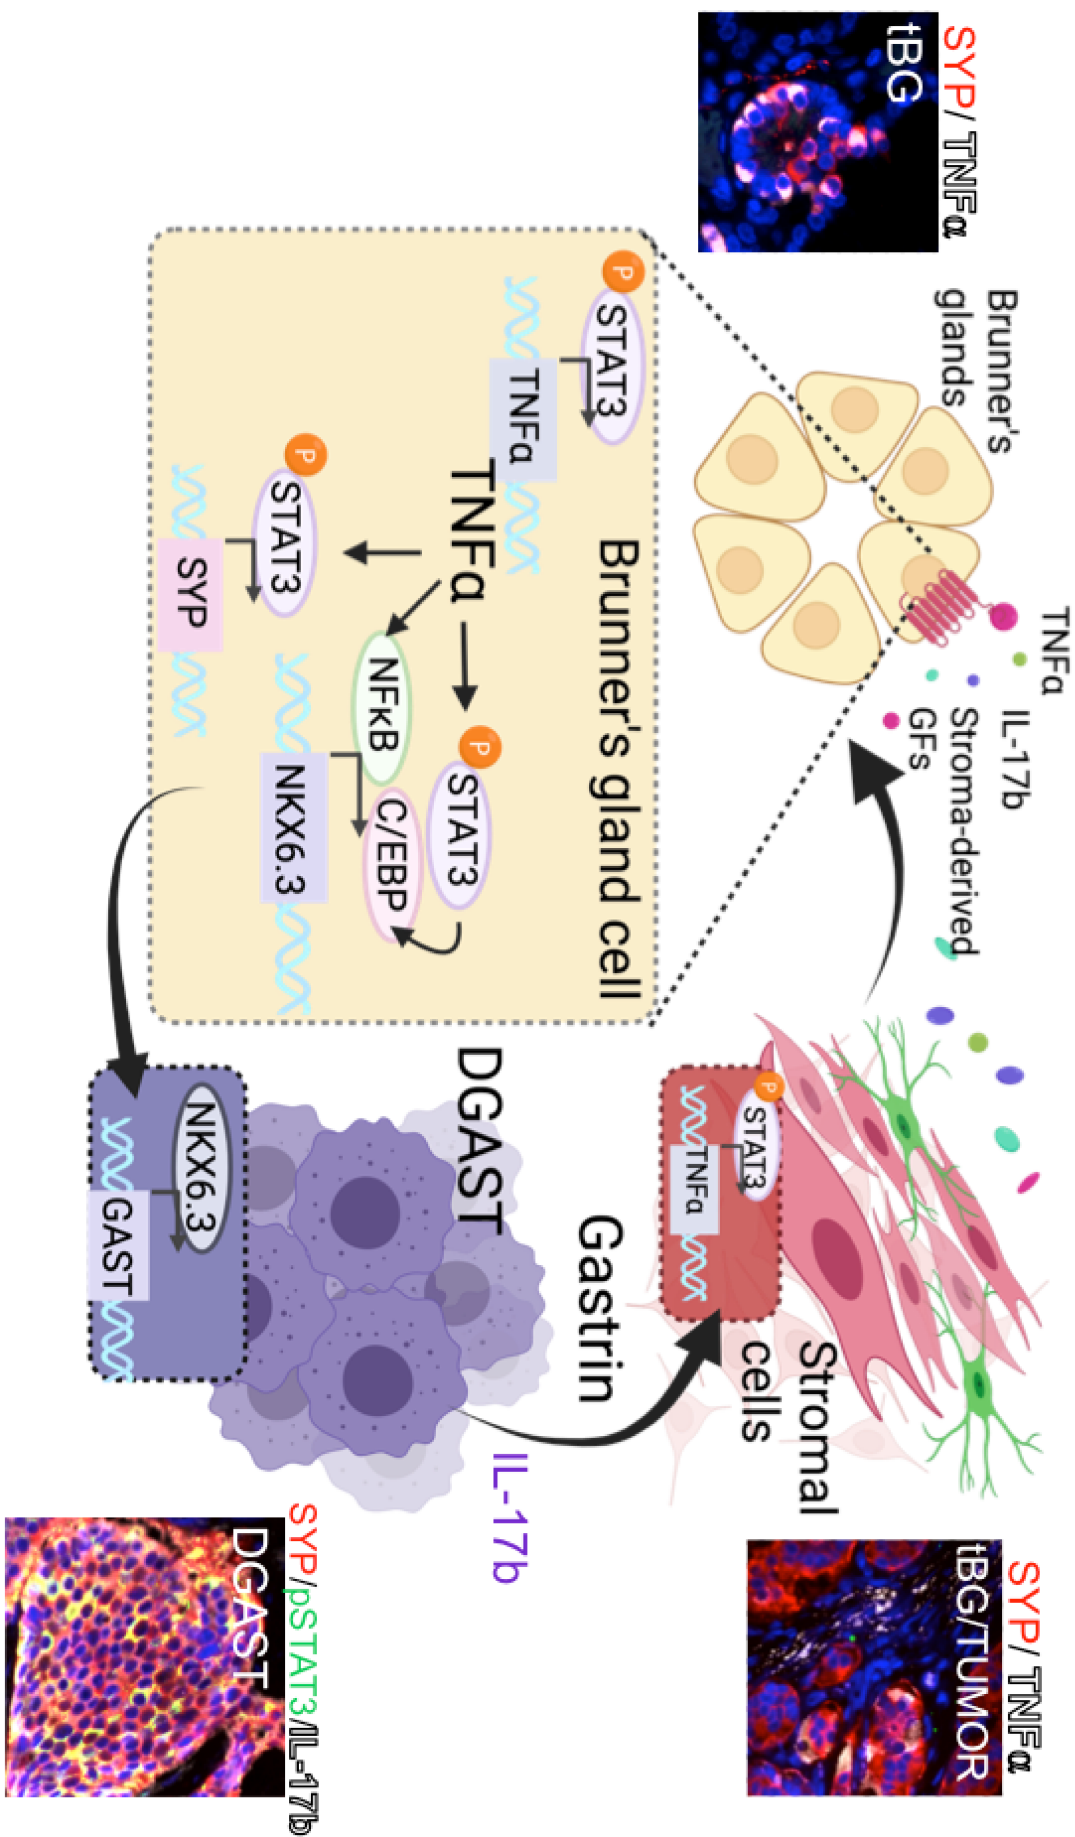

Supplement: bmjgast-2021-000765supp007.pdf [file bmjgast-2021-000765supp007.pdf]
